# Supplementary material for: Safety and Efficacy of Midline vs Peripherally Inserted Central Catheters Among Adults Receiving IV Therapy: A Randomized Clinical Trial
Source: PubMed Central journal article supplement (PMC10865154; doi:10.1001/jamanetworkopen.2023.55716), 2024-02-13
Supplement: jamanetwopen-e2355716-s001.pdf [file jamanetwopen-e2355716-s001.pdf]

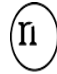

1 **STUDY PROTOCOL**

---

2  
3  
4  
5  
6  
7  
8  
9  
10  
11  
12  
13  
14  
15  
16  
17  
18  
19  
20  
21  
22  
23  
24  
25  
26  
27  
28  
29  
30  
31  
32  
33  
34  
35  
36  
37  
38  
39  
40  
41

Comparison of two peripherally inserted catheters: a central venous and a midline

**Sammenligning af to perifert anlagte katetre: et central venøst versus et midline**

**Protocol version 2, 3<sup>th</sup> of September 2018**

**Applicable protocol registration numbers:**

ClinicalTrial.gov identifier: NCT04140916

|    |          |                                                                                   |    |
|----|----------|-----------------------------------------------------------------------------------|----|
| 42 | <b>1</b> | <b>Table of contents</b>                                                          |    |
| 43 | 2        | Abstract: .....                                                                   | 4  |
| 44 | 3        | Administrative information .....                                                  | 5  |
| 45 | 4        | Introduction and background .....                                                 | 6  |
| 46 |          | 4.1 Introduction .....                                                            | 6  |
| 47 |          | 4.2 Background .....                                                              | 6  |
| 48 |          | 4.3 The trial .....                                                               | 7  |
| 49 |          | 4.4 Risk and benefits by participating in the trial .....                         | 7  |
| 50 |          | 4.5 Trial conduct .....                                                           | 7  |
| 51 |          | 4.6 Schedule for study conduct including time line for key study milestones ..... | 8  |
| 52 | 5        | Trial objective and purpose.....                                                  | 8  |
| 53 |          | 5.1 Objective and purpose .....                                                   | 8  |
| 54 | 6        | Trial design .....                                                                | 8  |
| 55 |          | 6.1 Design.....                                                                   | 8  |
| 56 |          | 6.2 Method .....                                                                  | 8  |
| 57 |          | 6.2.1 Catheter placement .....                                                    | 8  |
| 58 |          | 6.2.2 Trial flow-chart.....                                                       | 9  |
| 59 | 7        | Selection of participants .....                                                   | 9  |
| 60 |          | 7.1 Inclusion criteria.....                                                       | 9  |
| 61 |          | 7.2 Exclusion criteria .....                                                      | 9  |
| 62 | 8        | Outcomes .....                                                                    | 10 |
| 63 |          | 8.1 Primary outcome .....                                                         | 10 |
| 64 |          | 8.2 Secondary outcome .....                                                       | 10 |
| 65 | 9        | Recruitment procedures and data collection .....                                  | 10 |
| 66 |          | 9.1 Recruitment procedure.....                                                    | 10 |
| 67 |          | 9.2 Data collection .....                                                         | 10 |
| 68 |          | 9.2.1 Method .....                                                                | 10 |
| 69 |          | 9.2.2 Variables .....                                                             | 11 |
| 70 | 10       | Ethical considerations .....                                                      | 12 |
| 71 |          | 10.1 Ethical justification and trial rationale .....                              | 12 |
| 72 | 11       | Data handling and record keeping .....                                            | 13 |
| 73 |          | 11.1 Data management.....                                                         | 13 |
| 74 |          | 11.2 Confidentiality .....                                                        | 13 |
| 75 |          | 11.3 Access to data.....                                                          | 13 |
| 76 | 12       | Statistical plan and data analysis .....                                          | 13 |
| 77 |          | 12.1 Sample size estimation and power calculation .....                           | 13 |
| 78 |          | 12.2 Statistical methods .....                                                    | 13 |
| 79 |          | 12.2.1 Significance .....                                                         | 13 |
| 80 | 13       | Legal and organisational aspects .....                                            | 14 |

|     |      |                                                          |    |
|-----|------|----------------------------------------------------------|----|
| 81  | 13.1 | Finance .....                                            | 14 |
| 82  | 13.2 | Compensation .....                                       | 14 |
| 83  | 13.3 | Insurance .....                                          | 14 |
| 84  | 13.4 | Plan for publication, authorship and dissemination ..... | 14 |
| 85  | 13.5 | Intellectual property rights.....                        | 14 |
| 86  | 14   | References.....                                          | 14 |
| 87  |      |                                                          |    |
| 88  |      |                                                          |    |
| 89  |      |                                                          |    |
| 90  |      |                                                          |    |
| 91  |      |                                                          |    |
| 92  |      |                                                          |    |
| 93  |      |                                                          |    |
| 94  |      |                                                          |    |
| 95  |      |                                                          |    |
| 96  |      |                                                          |    |
| 97  |      |                                                          |    |
| 98  |      |                                                          |    |
| 99  |      |                                                          |    |
| 100 |      |                                                          |    |
| 101 |      |                                                          |    |
| 102 |      |                                                          |    |
| 103 |      |                                                          |    |
| 104 |      |                                                          |    |
| 105 |      |                                                          |    |
| 106 |      |                                                          |    |
| 107 |      |                                                          |    |
| 108 |      |                                                          |    |
| 109 |      |                                                          |    |
| 110 |      |                                                          |    |
| 111 |      |                                                          |    |
| 112 |      |                                                          |    |
| 113 |      |                                                          |    |
| 114 |      |                                                          |    |
| 115 |      |                                                          |    |
| 116 |      |                                                          |    |
| 117 |      |                                                          |    |
| 118 |      |                                                          |    |
| 119 |      |                                                          |    |
| 120 |      |                                                          |    |
| 121 |      |                                                          |    |
| 122 |      |                                                          |    |
| 123 |      |                                                          |    |
| 124 |      |                                                          |    |
| 125 |      |                                                          |    |
| 126 |      |                                                          |    |

## 127 2 Abstract

128

129 **Background:** Central venous access via catheter insertion has become a very common practice in the  
130 hospital and outpatient settings for various purposes, including hemodynamic monitoring, infusion of  
131 irritant drugs like chemotherapy or total parenteral nutrition (TPN), poor peripheral venous access or  
132 long term administration of drugs such as antibiotics. The overall complication rate is more than 15%  
133 and a great preventive effort is done. Catheter Related Bloodstream Infection (CRBSI) and deep vein  
134 thrombosis are serious and feared complications associated with prolonged hospital stays, increased  
135 costs and risk of mortality.

136 Peripherally inserted central catheter (PICC) is a central venous catheter (CVC) which is easy to place,  
137 safe and cost-effective and a well-established alternative compared with other CVCs.

138 Midline is another peripherally inserted catheter, which by definition is 7.5 to 20 centimetres long (3-8  
139 inches) and thus not a central venous catheter. It is inserted in the same peripherally veins as the PICC,  
140 but the tip is advanced no further than the distal axillary vein. The midline cannot be used to vesicants  
141 or irritants like most chemotherapy, vasoactive agents, TPN or medications with extremely low or high  
142 pH values. The midline is suitable for use from 5 days until 4 weeks.

143

144 **Objectives:** To assess the efficacy and safety of midline catheters using standard care with PICC as  
145 reference.

146

147 **Design:** Single-center non-blinded randomised clinical trial.

148

149 **Inclusion and exclusion criteria:** We will assess eligibility among all patients to whom staff from a  
150 general ward requests a CVC and who meet the inclusion criteria: 1) over the age of 18 years, 2)  
151 indication for intravenous medicine or fluids for 5 to 28 days and 4) have given informed consent. We  
152 will exclude patients fulfilling one or more of the exclusion criteria: 1) have infection or burns at both  
153 upper extremities, 2) are pregnant, 3) have a CVC already in place or 4) earlier randomized to the study.

154

155 **Methods:** With the patient supine ultrasound is used to identify the desired vein on the relevant upper  
156 extremity with full sterile coverage and after chlorhexidine preparation a catheter is placed using the  
157 Seldinger technique. Successful placement in a vein is secured by aspirating blood from the catheter.  
158 Depending on the randomization a PICC is placed and the tip position in vena cava superior is verified by  
159 a chest x-ray or a midline is placed without the need of x-ray verification.

160

161 **Outcomes:** Primary outcome: Any registered CRBSI in the time window from placement to removal of  
162 the catheter, defined by clinical signs of infection and at least one positive blood culture in the absence  
163 of other apparent source for the infection, except the catheter. In addition, a quantitative catheter tip  
164 culture with the same organism isolated from the catheter segment and peripheral blood culture also  
165 defines a CRBSI. Secondary outcome: Any registered other complication in the time window from  
166 placement to removal of the catheter, including DVT, catheter failure of mechanical cause, phlebitis,  
167 infiltration, pain in relation to drug or fluid administration or leaking of blood or fluids from the puncture  
168 site.

169

170 **Trial size:** Based on an expected incidence of CRBSI at 5% in the PICC group with reference to the  
171 literature and an expected incidence of 0% in the midline group with reference to a follow-up of the first  
172 107 midline catheters inserted in patients at Aalborg University Hospital, an alpha of 0.05 and a beta of  
173 0.2 (power 0.8) the sample size is 304 with 152 patients in each group.

174

175

176  
177  
178  
179  
180  
181  
182  
183  
184  
185  
186  
187  
188  
189  
190  
191  
192  
193  
194  
195  
196  
197  
198  
199  
200  
201  
202  
203  
204  
205  
206  
207  
208  
209  
210  
211  
212  
213  
214  
215  
216  
217  
218  
219  
220  
221  
222  
223  
224

### **3 Administrative information**

This trial is initiated by Simon Ladehoff Thomsen.  
The Department of Anaesthesia and Intensive Care, Aalborg University Hospital finances all costs associated with the trial.

#### **Clinical responsible**

Simon Ladehoff Thomsen, MD,  
Telephone: 97 66 18 64

#### **Responsible investigator**

Professor Bodil Steen Rasmussen, MD, PhD  
Telephone: 97 66 18 93

#### **Project group**

Professor Bodil Steen Rasmussen, MD, PhD <sup>1)</sup>  
Simon Ladehoff Thomsen, MD<sup>1)</sup>  
Rikke Boa, nurse anesthetist<sup>1)</sup>  
Anita Olsson, nurse anesthetist<sup>1)</sup>  
Marianne Levin, Critical care nurse<sup>1)</sup>  
Lars Winther Jensen, MD <sup>2)</sup>

1) Department of Anaesthesia and Intensive Care, Aalborg University Hospital

2) Centre for Nutrition and Bowel Disease, Department of Gastroenterology, Aalborg University Hospital

#### **Trial site**

Department of Anaesthesia and Intensive Care, Aalborg University Hospital

225  
226  
227  
228

## 4 Introduction and background

### 4.1 Introduction

230 In the United States more than 5 million patients each year get a central venous catheter<sup>1</sup>. Indications  
231 for central venous catheterization include infusion of irritant drugs like chemotherapy or total  
232 parenteral nutrition (TPN), poor peripheral venous access and long term administration of drugs such as  
233 antibiotics<sup>2</sup>. This ubiquitous procedure has many associated complications that result in morbidity,  
234 mortality, and increased healthcare cost. The overall complication rate is more than 15% and a great  
235 preventive effort is done<sup>1</sup>.

### 4.2 Background

237 Catheter Related Bloodstream Infection (CRBSI) is a serious and feared complication associated with  
238 prolonged hospital stays, increased costs and risk of mortality<sup>3</sup>. CRBSI is defined as the presence of  
239 bacteremia originating from an intravenous catheter. A lot of effort is done to reduce CRBSI including  
240 heightened attention to hygiene in placement and care, improved education and training, and  
241 placement of a team with specialized skills. Adherence to best practice for central line placement is  
242 shown to reduce risk of CRBSI<sup>4</sup>.

243 Central venous catheters (CVCs) are associated with deep vein thrombosis (DVT) and pulmonary  
244 embolism<sup>5</sup>. Besides interruption in treatment, catheter-related DVT increases morbidity and mortality.  
245 Cancer and admission to intensive care are independent risk factors. Existing data report wide estimates  
246 of this adverse outcome, ranging from less than 1% to as high as 38.5%, dependent on the population  
247 studied, method of diagnosis, and use of prophylaxis measures<sup>5</sup>.

248 Peripherally inserted central catheter (PICC) is a CVC which placement and use have been widespread  
249 since it was first described in 1975<sup>6</sup>. It is a well-established alternative to CVCs placed via for example  
250 the subclavian or jugular veins. It is easy to place, safe and cost-effective compared to others often used  
251 central lines. PICC is inserted via a peripheral vein in the upper arm and terminates like other central  
252 lines in the vena cava superior. Placement and use is associated with few complications<sup>7</sup>.

253 Another peripherally inserted catheter is the midline which by definition is 7.5 to 20 centimeters long (3-  
254 8 inches) and thus not a central venous catheter. The midline catheter was introduced in 1950s<sup>8</sup>. It has  
255 since that time undergone major improvement in material technology and techniques for achieving  
256 vascular access. It is inserted in the same peripherally veins as the PICC, but the tip is advanced no  
257 further than the distal axillary vein and is therefore classified as a peripheral intravenous catheter with  
258 corresponding advantages and disadvantages. The midline cannot be used to vesicants or irritants like  
259 most chemotherapy, vasoactive agents, TPN or medications with extremely low or high pH values. The  
260 midline is suitable for use from 5 days until 4 weeks to drugs and solutions, which safely can be  
261 administrated in a peripheral venous catheter. Severe complication to placement and use of midline is  
262 rare, but due to previous problems primarily related to the midline catheter material, its use is limited<sup>9</sup>.

263 In a large review from 2006 the incidence of CRBSI among in- and outpatients having PICC or midline  
264 were estimated to 3.1% (95% CI 2.6-3.7) and 0.4% (95% CI 0.0-0.9), respectively<sup>10</sup>. It has been  
265 demonstrated that central line use can be decreased through the use of midline catheters<sup>11</sup>.

266 A retrospective descriptive review from two hospitals in America showed the effectiveness of  
267 implementing a midline program resulted in a 78% reduction in central line-associated bloodstream  
268 infection<sup>12</sup>. In a similar Australian retrospective cohort study in a ventilator unit population, a significant  
269 decrease in the rate of central line-associated bloodstream infections was found after use of midlines in  
270 place of central lines<sup>13</sup>. It seems that the introduction and regular use of midlines when warranted may  
271 reduce the overall incidence of CRBSI and its sequelae in certain hospital environments.

272 In a meta-analysis including 11,476 hospital admitted patients with PICC, DVT was found in 3.44% (95%  
273 CI 2.46-4.43)<sup>5</sup>. DVT occurrence in relation to midline is understudied, but is reported with a low  
274 incidence between 0-2 %<sup>14,15,16</sup>. The overall incidence of DVT and related potentially secondary  
275 complications of both catheters seems low. The risk of minor complications such as pain, leakage or  
276 phlebitis is in a retrospective comparison study found to be 11.5% for midlines and 1.5% for PICC,  
277 respectively (P<0.001)<sup>13</sup>.  
278 The efficacy of the PICC is well studied, the incidence of side effects is known and its use is implemented  
279 all over the world. To our knowledge, no-one has compared the efficacy of midlines with a CVC in a  
280 prospective study. In this study we will examine the efficacy and safety of midline catheters using  
281 standard care with PICC as reference.  
282

### 283 **4.3 The trial**

284 Placement and use of PICC has since 2008 been well-established in our department and is standard care  
285 to patients who needs TPN, long term intravenous therapy or chemotherapy.

286 The applicability and overall complications of the midline catheter is understudied and mostly based on  
287 retrospective data. Midline has the potential to optimize the treatment of a wide range of patient  
288 categories as the material has been approved significantly. Since September 2017 we have tested the  
289 midline catheter, and after over 100 placements, we use it with success as an integrated offer in our  
290 intravenous access team.

291 Patients eligible for screening for inclusion are identified among all patients where staff from a general  
292 ward requests a central line. In the Department of Anaesthesia upon the primary contact, the  
293 anesthesiologist in charge or special trained nurse will perform the inclusion process and randomization.  
294 The randomization is 1:1 between the PICC (control group) and a midline catheter (intervention group).  
295 After placement the patients will be closely followed until the day of removal of the catheter. To obtain  
296 information on length of hospital stay and mortality, the electronic journal will be checked until 90  
297 days after catheter removal. The Incidence of complications that occur will be registered and the two  
298 catheter groups will be compared.  
299

### 300 **4.4 Risk and benefits by participating in the trial**

301 In patients with poor peripheral venous access or need of long time administration of medicine or fluids  
302 a central line is routinely placed. In our department it is standard care to place a PICC in these patients.

303 The puncture site on the upper arm and placement technique are the same for both catheter types.

304 Therefore the complications during placement are expected to be independent of catheter type. PICC  
305 require x-ray confirmation of tip placement, leading to additional costs and exposing the patient to  
306 unnecessary radiation. X-ray verification of tip position is not necessary when placing the midline  
307 catheter. By participating in this study the patients have benefit of more close observation and patients  
308 in the intervention group have the possible benefit of reduced risk of having a CRBSI. In the intervention  
309 group, the risk of minor complications like pain in relation to fluid or medicine administration,  
310 infiltration or phlebitis is expected to be increased compared with the control group. The discomfort in  
311 relation to the minor complications is expected to disappear without any persistent complications.  
312  
313  
314

### 315 **4.5 Trial conduct**

316 The trial will be conducted in accordance with the published study protocol, under the principles of the  
317 Helsinki declaration and after approval by the local committee on health research ethics and the Danish

318 Data Protection Agency according to Danish law. The protocol will be registered on  
319 [www.clinicaltrials.gov](http://www.clinicaltrials.gov) before the trial is started.  
320

## 321 **4.6 Schedule for study conduct including time line for key study milestones**

- 322 • Start of preparation: 1<sup>st</sup> of August 2018
- 323 • Start of clinical trial: 1<sup>st</sup> of September 2018
- 324 • End of clinical trial: 1<sup>st</sup> of March 2020
- 325 • End of data processing and analysis: 1<sup>th</sup> of June 2020
- 326

## 327 **5 Trial objective and purpose**

### 328 **5.1 Objective and purpose**

329 By registering severe and minor complications to intravenous catheters we will show the difference  
330 between the PICC, which is standard care, and the midline catheter among in- and out-hospital patients  
331 for whom the ward requests a central venous access.  
332

## 333 **6 Trial design**

### 334 **6.1 Design**

335 Single-center randomised controlled trial with in- and out-patients from medical and surgical  
336 departments on Aalborg University Hospital, Denmark.

### 337 **6.2 Method**

#### 338 6.2.1 Catheter placement

339 The informed consent and randomization is performed in the Department of Anaesthesia prior to  
340 placement of catheter described below in section 9.1.

341 With the patient supine ultrasound is used to identify the desired vein on the relevant upper extremity.

342 Full sterile technique is used and includes the operator wearing sterile gown, mask, cap, and sterile  
343 gloves. The area is then prepared with chlorhexidine followed by adequate sterile draping. The Seldinger  
344 technique is used to insert the catheter. Successful placement in a vein is secured by aspirating blood  
345 from the catheter. The catheter is then flushed with minimum 20 mL saline.

346 Depending on the randomization a PICC is placed and the tip position in vena cava superior is verified by  
347 a chest x-ray or a midline is placed without the need of x-ray verification. The patient is then returned to  
348 the medical or surgical ward.  
349

350

351

352

353

354

355

356

357

358

359



360  
361  
362

## 6.2.2 Trial flow-chart

The following consort diagram will be continuously filled out to monitor study progress.

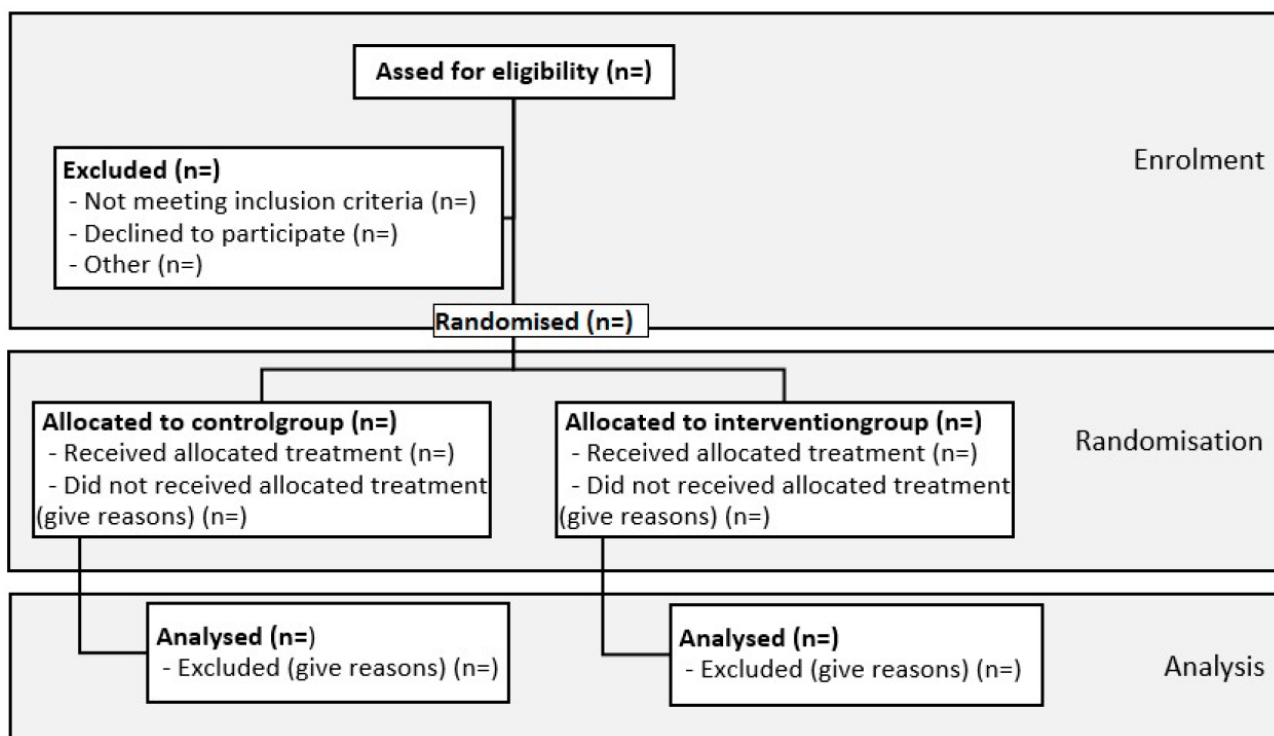

363  
364  
365  
366

## 7 Selection of participants

367

### 7.1 Inclusion criteria

368  
369  
370  
371  
372  
373  
374  
375  
376  
377

- Over the age of 18 years (*The age of the patient in whole years at the time of the trial. The age will be calculated from date of birth*)
- Indication for intravenous medicine or fluids included in the following:
  - Blood products, isotonic saline- or glucose-solutions (including glucose-insulin-potassium-solutions)
  - Antibiotics (penicillins, cephalosporins, carbapenems or fluoroquinolones)
  - Chemotherapy registered for use in a peripheral vein catheter
- Expected indication for intravenous access in 5 to 28 days (*Evaluated by ward staff*)
- Informed consent (*Defined in 5.1*)

378

### 7.2 Exclusion criteria

379  
380  
381  
382

- Infection or burns at both upper extremities (*Involving the area of puncture site*)
- Pregnancy (*Confirmed by positive urine human gonadotropin (hCG) or plasma-hCG*)
- A central venous catheter already in place (*Self-explanatory*)
- Earlier randomized to the study (*Self-explanatory*)

## 383 8 Outcomes

### 384 8.1 Primary outcome

385 Any registered CRBSI in the time window from placement to removal of the catheter (*Defined by clinical*  
386 *signs of infection (i.e., fever, chills, leukocytosis or hypotension) and at least one positive blood culture*  
387 *obtained from a peripheral vein and/or from venous access device in the absence of other apparent*  
388 *source for the infection, except the catheter. In addition, a quantitative (>1000 colony-forming units*  
389 */catheter segment) catheter tip culture with the same organism (species and anti-biogram) isolated from*  
390 *the catheter segment and peripheral blood culture also defines a CRBSI*  
391

### 392 8.2 Secondary outcome

393 Any registered other complications in the time window from placement to removal of the catheter:

- 394
- 395 • DVT (*Defined by the formation of one or more symptomatic or non-symptomatic blood clots in a*  
396 *large vein verified by ultrasound (US) or computed tomography (CT) scan*)
- 397 • Catheters failure of mechanical cause (*Fallen out, pulled out by mistake, occluded, broken or*  
398 *other defects*)
- 399 • Phlebitis defined as 2 or more on the phlebitis scale (*see below*)
- 400 • Infiltration defined as 2 or more on the infiltration scale (*see below*)
- 401 • Pain in relation to drug or fluid administration (*Defined as above 3 cm on the Pain Visual Analog*  
402 *Scale*)
- 403 • Leaking of blood or fluids from the puncture site (*Evaluated by the ward staff*)  
404  
405

## 406 9 Recruitment procedures and data collection

### 407 9.1 Recruitment procedure

408 Subjects are recruited at Aalborg University Hospital among patients where staff from a general ward  
409 requests a central line. The anesthesiologist or special trained nurse responsible for inclusion will apply  
410 to the national regulations regarding informed consent to participation in a clinical trial. Hence, in  
411 addition to oral information the potential participant will receive written information including both the  
412 specific information on the current study as well as the general information pamphlet on participant  
413 rights when entering a clinical trial. All information and inclusion will be given by physicians or special  
414 trained nurses who possess the sufficient professional prerequisites to be authorized by the sponsor to  
415 have a direct involvement in the project.

416 Information will be given in private and the participant will be allowed to have an assessor present. The  
417 participant will be given a brief reflection period before making their decision. As always it is voluntary  
418 to participate and the subjects can withdraw their commitment to participate at any time.

### 419 9.2 Data collection

#### 420 9.2.1 Method

421 Participants will be randomized in either the intervention or the control group using the online  
422 randomization tool Research Electronic Data Capture (REDCap), Aarhus University, Denmark.

423 All baseline information and data from the placement procedure in the Department of Anaesthesia will  
424 be registered on paper and directly entered into the REDcap database. A registration paper will follow  
425 the patient to the ward and the staff will daily register the occurrence of the primary or secondary

426 endpoints. All registration sheets will subsequently be collected by the investigators and entered online  
427 in the Redcap database. **Participants agree with their participation that investigators will use their**  
428 **electronic journal.** The electronic journal will be followed to register complication not noted on the  
429 registration paper. If the patient is discharged the electronic journal will be followed for 90 days to  
430 registrar potential re-admissions and or mortality. Access for data registration and access to already  
431 submitted data will be granted to all the initiating investigators.  
432 Information from the examination done at the admission to hospital and listed in the medical journal is  
433 used to fill out the baseline variables: age, sex, height, weight, medical history and clinical examination  
434 to make it possible to describe the cohort. For definitions see below.  
435

#### 436 9.2.2 Variables

437 Baseline variables:

438

- 439 • Date of birth (*Self-explanatory*)
- 440 • Age (*Defined in inclusion criteria*)
- 441 • Sex (*The genotypic sex of the participant*)
- 442 • Ethnicity (*Defined as race and thereby emphasizing shared physical appearance based on genetic*  
443 *origin*)
- 444 • Height (*In centimetres, if lower extremities are bilaterally amputated, the estimated original height*  
445 *should be used*)
- 446 • Weight (*In kilograms with one decimal*)
- 447 • BMI (*Weight divided with height (in meters) squared. A result between 18.5 and 25 is considered*  
448 *normal, less than 18.5 as underweight and more than 25 as overweight*)
- 449 • Medical history (*An account of any symptoms/illness experienced now or before by the participants*)  
450 and clinical examination (*The process by which a medical doctor investigates the body of a*  
451 *participant for signs of disease*) to determine Charlson Comorbidity Index.

452

453 During placement on the anaesthesia department:

454

- 455 • Date of randomization (*The date the individual patient have their randomization*)
- 456 • Date of placement (*If different from date of randomization*)
- 457 • Time spent on placement (*Time in minutes and seconds from first skin puncture to placement of*  
458 *dressing*)
- 459 • Number of skin puncture (*Self-explanatory*)
- 460 • Type and length of placed catheter (*Product manufacturer, catheter type and length in centimetres*)
- 461 • Name of the access-vein (*Name of the vein on the upper-arm*)
- 462 • Accidental arterial puncture (*Self-explanatory*)
- 463 • Bleeding complications (*arterial or venous haemorrhage during placement including haematoma or*  
464 *arterial aneurism*)
- 465 • Tip placement on chest x-ray (*control group only - assessed from an anterior and posterior X-ray of*  
466 *thorax*)

467

468

469

470

471

472

473

474

475

476 After placement on the ward:

477

478 • CRBSI (*As defined under 5.1*)

479 • Catheter removal date (*The date of catheter removal*)

480 • Catheters removal cause:

481

482 • Pain in relation to drug or fluid administration (*Patient reported pain above 3 cm on the Pain*  
483 *Visual Analog Scale in relation to drug or fluid administration* )

484 • Phlebitis scale score above 1:

485                   0 *No symptoms*

486                   1 *Erythema at access site with or without pain*

487                   2 *Pain at access site with erythema or edema*

488                   3 *Pain at access site with erythema or edema; streak formation; palpable*  
489 *venous cord*

490                   4 *Pain at access site with erythema or edema; streak formation; palpable*  
491 *venous cord < 2.5 cm in length; purulent drainage*

492

493 • Infiltration scale score above 1:

494                   0 *No symptoms*

495                   1 *Skin blanched; edema < 2.5 cm in any direction; cool to touch; with or*  
496 *without pain*

497                   2 *Skin blanched; edema in 2.5 to 15 cm in any directions; cool to touch;*  
498 *with or without pain*

499                   3 *Skin blanched, translucent; gross edema > 15 cm in any directions; cool*  
500 *to touch; mil-to-moderate pain; possible numbness*

501                   4 *Skin blanched, translucent; skin tight; leaking; skin discoloured;*  
502 *bruised; swollen; gross edema > 15 cm in any direction; deep pitting*  
503 *tissue edema; circulatory impairment: moderate-to-severe pain;*  
504 *infiltration of any amount of blood product, irritant, or vesicant*

505

506

507 • Mechanical cause (*Fallen out, pulled out by mistake, occluded, broken or other defects*)

508 • Leaking of blood or fluids from the puncture site (*Evaluated by the ward staff*)

509

510

511 • Deep vein thrombosis (*Verified on CT or US with or without symptoms*)

512 • Date of death (*Self-explanatory*)

513 • Date of discharge (*The day the patient is discharged from hospital*)

514 • Date of re-admission (*The day the patient is re-admitted to hospital*)

515

516

## 517 **10 Ethical considerations**

### 518 **10.1 Ethical justification and trial rationale**

519

520 In this study we will describe the safety and efficacy of the midline catheter compared with the PICC.

521 Regardless of a patient being treated within the study or declines participation, a central venous access

522 is needed. As both the midline and PICC are well established methods to secure venous access, no  
523 significant disadvantages or ethical concerns are found with conduction of the study.  
524 If our hypothesis is confirmed, the risk of CRBSI will be reduced against acceptable increased  
525 disadvantages. The reduced number of major complications can lead to a potential minor decreased  
526 mortality in the intervention group.  
527 It is voluntarily to participate in the trial and based on an informed and signed consent. At any moment  
528 this consent can be withdrawn by the participant. The participants will be given oral and written  
529 information about the trial before they can give their consent and before inclusion.  
530

## 531 **11 Data handling and record keeping**

### 532 **11.1 Data management**

533 Data recorded during the study is stored in electronic as well as in the written form. The Danish Data  
534 Protection Agency's standard terms regarding security will be followed.

### 535 **11.2 Confidentiality**

536 Each participant will receive a unique trial identification number and all personalized information will be  
537 anonymized. Data is handled according to Danish law.

### 538 **11.3 Access to data**

539 Specially authorized persons from the local committee on health research ethics, the Danish Medicines  
540 Agency and the Danish Data Protection Agency will have unimpeded access to monitor and inspect all  
541 data and documents during the trial.  
542

## 543 **12 Statistical plan and data analysis**

### 544 **12.1 Sample size estimation and power calculation**

545 The primary outcome is CRBSI. The power calculation is based on an expected incidence of 5% in the  
546 PICC group with reference to the literature and an expected incidence of 0% in the midline group with  
547 reference to a follow-up of the first 107 midline catheters inserted in patients at Aalborg University  
548 Hospital from the 5th of October 2017 to the 26th of February 2018. With an alpha of 0.05 and a beta of  
549 0.2 (power 0.8) the sample size is 304 with 152 patients in each group.

### 550 **12.2 Statistical methods**

551 Descriptive data will be presented in a baseline table according to catheter type. For normally  
552 distributed measurements the differences between groups will be compared using Student's t-test.  
553 Variables considered not to be normally distributed will be analysed by Mann-Whitney's U-test.  
554 The results from primary and secondary endpoints will be presented in a separate table also according  
555 to catheter type. The differences between groups will be compared using Wilcoxon two-samples  
556 test/Fisher's exact or unpaired t-test. Statistical analyses will be performed using STATA software  
557 (version 14; STATA, Corporation, College Station, TX)  
558

#### 559 **12.2.1 Significance**

560 A two-sided P value of less than 0.05 will be considered statistical significant.  
561

## 562 **13 Legal and organisational aspects**

### 563 **13.1 Finance**

564 All initiative for the current study has been taken by the previously stated members of the project  
565 group. They have no personal economic involvement, no possible economic gain from any outcome and  
566 no ties to the medical industry or corporations gaining from study outcomes. Funding for the purchase  
567 of iPads for data registration and statistical assistance in the analysis phase will be sought from relevant  
568 private and public funds. Due to the modest running expenditures comprising only the catheters already  
569 present at the hospital, the study will be conducted regardless of any successful funds applications.

### 570 **13.2 Compensation**

571 No benefits are paid to the patients for participating in the study.

### 572 **13.3 Insurance**

573 The participants are covered according to Danish law.

### 574 **13.4 Plan for publication, authorship and dissemination**

575 All positive, negative and inconclusive results are published via [www.clinicaltrials.gov](http://www.clinicaltrials.gov).

576 Our plan is to write at least one paper for publication.

577 "Comparison of peripherally inserted central catheters and midlines; a randomized and controlled trial",  
578 S.L. Thomsen, R. Boa, A. Olsson, M. Levin L. W. Jensen, B. S. Rasmussen, journal, xx 2020.

579 Results are presented at the annually meeting of the Danish Society of Anaesthesiology and Intensive  
580 care Medicine or at an international conference.

581 No data can be retained from publication.

### 582 **13.5 Intellectual property rights**

583 As according to general guidelines.

584

## 585 **14 References**

---

<sup>1</sup> McGee DC, Gould MK. Preventing complications of central venous catheterization. *N Engl J Med*. 2003 Mar 20;348(12):1123-33.

<sup>2</sup> Smith RN, Nolan JP. Central venous catheters. *BMJ*. 2013 Nov 11;347:f6570.

<sup>3</sup> Gahlot R, Nigam C, Kumar V, Yadav G, Anupurba S. Catheter-related bloodstream infections. *Int J Crit Illn Inj Sci*. 2014 Apr;4(2):162-7.

<sup>4</sup> Centers for Disease Control and Prevention (CDC). Vital signs: central line-associated blood stream infections--United States, 2001, 2008, and 2009. *MMWR Morb Mortal Wkly Rep*. 2011 Mar 4;60(8):243-8.

<sup>5</sup> Chopra V, Anand S, Hickner A, Buist M, Rogers MA, Saint S, Flanders SA. Risk of venous thromboembolism associated with peripherally inserted central catheters: a systematic review and meta-analysis. *Lancet*. 2013 Jul 27;382(9889):311-25.

<sup>6</sup> Hoshal VL. Total intravenous nutrition with peripherally inserted silicone elastomer central venous catheters. *Arch Surg*. 1975 May;110(5):644-6.

<sup>7</sup> Chopra V, Anand S, Krein SL, Chenoweth C, Saint S. Bloodstream infection, venous thrombosis, and peripherally inserted central catheters: reappraising the evidence. *Am J Med*. 2012 Aug;125(8):733-41.

<sup>8</sup> Anderson NR. Midline catheters: the middle ground of intravenous therapy administration. *J Infus Nurs*. 2004 Sep-Oct;27(5):313-21.

<sup>9</sup> Adams DZ<sup>1</sup>, Little A<sup>2</sup>, Vinsant C<sup>1</sup>, Khandelwal S<sup>1</sup>. The Midline Catheter: A Clinical Review. *J Emerg Med*. 2016 Sep;51(3):252-8.

- 
- <sup>10</sup> Maki DG, Kluger DM, Crnich CJ. The risk of bloodstream infection in adults with different intravascular devices: a systematic review of 200 published prospective studies. *Mayo Clin Proc.* 2006;81:1159–71.
- <sup>11</sup> Pathak R, Patel A, Enuh H, Adekunle O, Shrisgantharajah V, Diaz K. The Incidence of Central Line-Associated Bacteremia After the Introduction of Midline Catheters in a Ventilator Unit Population. *Infect Dis Clin Pract (Baltim Md).* 2015 May;23(3):131-134.
- <sup>12</sup> Moureau N, Gordon S, Margaret H. How to Establish an Effective Midline Program: A Case Study of 2 Hospitals. *J Vasc Access.* 2015 Sept; 20(3):179-188
- <sup>13</sup> Pathak R, Patel A, Enuh H, Adekunle O, Shrisgantharajah V, Diaz K. The Incidence of Central Line-Associated Bacteremia After the Introduction of Midline Catheters in a Ventilator Unit Population. *Infect Dis Clin Pract (Baltim Md).* 2015 May;23(3):131-134
- <sup>14</sup> Xu T, Kingsley L, DiNucci S, Messer G, Jeong JH, Morgan B, Shutt K, Yassin MH. Safety and utilization of peripherally inserted central catheters versus midline catheters at a large academic medical center. *Am J Infect Control.* 2016 Dec 1;44(12):1458-1461.
- <sup>15</sup> Caparas JV, Hu JP. Safe administration of vancomycin through a novel midline catheter: a randomized, prospective clinical trial. *J Vasc Access.* 2014 Jul-Aug;15(4):251-6.
- <sup>16</sup> Dumont C1, Getz O, Miller S. Evaluation of midline vascular access: a descriptive study. *Nursing.* 2014 Oct;44(10):60-6.
