# Supplementary material for: Safety and Efficacy of Midline vs Peripherally Inserted Central Catheters Among Adults Receiving IV Therapy: A Randomized Clinical Trial
Source: PubMed Central journal article supplement (PMC10865154; doi:10.1001/jamanetworkopen.2023.55716), 2024-02-13
Supplement: jamanetwopen-e2355716-s002.pdf [file jamanetwopen-e2355716-s002.pdf]

## Data Sharing Statement

Thomsen. Safety and Efficacy of Midline vs Peripherally Inserted Central Catheters Among Adults Receiving IV Therapy. *JAMA Netw Open*. Published February 13, 2024.  
doi:10.1001/jamanetworkopen.2023.55716

### Data

**Data available:** No
